# Supplementary material for: Arsenite Oxidation by a Newly Isolated Betaproteobacterium Possessing arx Genes and Diversity of the arx Gene Cluster in Bacterial Genomes
Source: Front Microbiol. 2019 May 29;10:1210. doi: 10.3389/fmicb.2019.01210 (PMC6549141; doi:10.3389/fmicb.2019.01210)
Supplement: Supplementary file 4 [file Table_3.XLSX]

## Sheet: Sheet1
Supplemental Table S3. Characteristic of the organisms which have arx genes.
Organism name	Size (Mb)	GC%	Proteins	Scaffolds	Isolate/ MAGs	Reference	Location of isolation/ sample	Temperature sample (°C)	pH sample	Arsenic concentration	oxygen requirement	Accession numbers
Halorhodospira halophila SL1	2.67845	68	2402	1	SL1	Raymond , J.C. Sistrom, W.R. 1967; Challacombe, JF et al. 2013	salt-encrusted mud on hypersaline, Summer lake (OR) USA	N/A	N/A	N/A	obligately anaerobic	GCA_000015585.1
Sulfuricella denitrificans skB26	3.21721	56.1162	3016	2	skB26	Kojima, H & Fukui, M. 2010; Watanabe, T et al. 2014	water from Lake Mizugaki. Japan	5	6.5	N/A	microaerophilic	GCA_000297055.2
Ectothiorhodospira sp. PHS-1	2.94321	63.7	2616	114	PHS-1	Kulp, T et al. 2008; Zargar, K et al. 2012	Red pigmented biofilm on rock surfaces in a hot pool Paoha Island hot spring (CA). USA	43	9.4	Arsenite 92 μM; arseN/Ate 9.7 μM	obligately anaerobic	GCA_000225005.2
Magnetospirillum magnetotacticum MS-1	4.52393	63.6	4077	36	MS-1	Blakemore, R. P. et al. 1979; Maratea, D. Blakemore, R P. 1981; Smalley, M et al. 2015	Muds of a freshwater swamp	N/A	N/A	N/A	microaerophilic	GCA_000829825.1
Alkalilimnicola ehrlichii MLHE-1	3.27594	67.5	2858	1	MLHE-1	Oremland, R et al. 2002; Hoeft, S. et al. 2007; Zargar, K et al. 2010	Anoxic bottom water of Mono Lake (CA). USA	20	9.8	200 μM	facultatively anaerobic	GCA_000014785.1
Halomonas boliviensis LC1	4.1334	54.7	3685	48	LC1	Quillaguamán, J et al. 2004; Balderrama-Subieta, A & Quillaguamán, J. 2013	soil sample arouNA Laguna Colorada (red-coloured hypersaline lake). Bolivia	N/A	N/A	N/A	aerobicic	GCA_002265845.1
Thiocapsa sp. KS1	10.3826	57.2	4432	43	KS1	Schott, J et al. 2010	sewage sludge of the municipal sewage treatment plant at Konstanz, Germany.	N/A	neutral	N/A	facultatively anaerobic	GCA_001499735.1
Marinospirillum alkaliphilum DSM 21637	3.13755	54.6	2854	22	DSM 21637	Zhang, W et al. 2002	Haoji soda lake, Mongolia. China	N/A	9.5	N/A	aerobic	GCA_900119735.1
Marinospirillum celere DSM 18438	3.08356	50.4	2829	12	DSM 18438	Namsaraev, Z et al. 2009	combined water– sediment slurry sample taken from a hot spring on Paoha island on Mono Lake (CA). USA	40	9.3	200 μM**	aerobic	GCA_900112235.1
Thioalkalivibrio nitratireducens DSM 14787	4.00235	66.5	3532	1	DSM 14787	Sorokin, D. et al. 2003	Sediment from hypersaline Lake Fazda, soda lake in the Wadi Natrun. Egypt	N/A	10	N/A	facultatively anaerobic	GCA_000321415.2
Azoarcus sp. CIB	5.25703	65.8	4603	1	CIB	Fernández-Llamosas, H et al. 2014; Martin-Moldes, Z et al. 2015;	From a DSMZ 12184 culture, supposed to be an Azoarcus sp. strain M3, isolated from a diesel fuel-contaminated aquifer at Menziken. Switzerland	N/A	N/A	N/A	facultatively anaerobic	GCA_001190925.1
Ectothiorhodospira sp. BSL-9	3.55008	63	3103	1	BSL-9	Hoeft McCann, S et al. 2017; Hernandez-maldonado, J. 2016	water collected in the shallow swamp region of Big Soda Lake	N/A	9.7	25 μM	anaerobic	GCA_001632845.1
Halomonas sp. BC04	5.9211	62.4	4212	433	BC04	https://www.ncbi.nlm.nih.gov/bioproject/221128	Mono Lake, (CA) USA	N/A	N/A	200 μM**	aerobicic	GCA_000568385.1
Azoarcus tolulyticus ATCC 51758	5.11039	66.4	4539	36	ATCC 51758	Zhou, J et al. 1995	Petroleum-contaminated freshwater aquifer sediment, 24 to 25 m deep (MI). USA	N/A	N/A	N/A	facultatively anaerobic	GCA_900156155.1
Thioalkalivibrio thiocyanodenitrificans ARhD 1	3.74665	64.8	3450	3	ARhD 1	Sorokin, D et al. 2004; Berben, T et al. 2015	Two mixed sediment samples from the soda lakes in Wadi Natrun (Egypt) and Kulunda steppe (Siberia, Russia)	N/A	9.2 - 10.5	N/A	facultatively anaerobic	GCA_000378965.1
Thioalkalivibrio sp. ARh3	2.7882	66.2	2626	15	ARh3	Sorokin, D et al. 2001; Sorokin, D et al. 2002; Sorokin, D et al. 2011	Soda Lake in Kenya, Africa	N/A	9.5 - 11.0	N/A	facultatively anaerobic	GCA_000377265.1
Thioalkalivibrio sp. ALSr1	2.92881	67.5	2664	25	ALSr1	Sorokin, D et al. 2011	Searles Lake, (CA) USA	N/A	9.8*	4000 μM*	facultatively anaerobic	GCA_000381945.1
Thioalkalivibrio sp. ALR17-21	2.99896	67.4	2756	65	ALR17-21	Sorokin, D et al. 2011	Kulunda Steppe, Altai, Russia	N/A	9.3 - 10.6	N/A	facultatively anaerobic	GCA_000420185.1
Thioalkalivibrio sp. ALMg11	3.03779	66	2832	18	ALMg11	Sorokin, D et al. 2011	North-eastern Mongolia	N/A	9.2 - 10.5	N/A	facultatively anaerobic	GCA_000377905.1
Thioalkalivibrio sp. ALM2T	2.92411	65.9	2668	26	ALM2T	Sorokin, D et al. 2013	Mono Lake, (CA) USA	N/A	9.7	200 μM**	facultatively anaerobic	GCA_000381505.1
Thioalkalivibrio sp. AKL17	2.80322	67.6	2581	18	AKL17	Sorokin, D et al. 2011	Kulunda Steppe, Altai, Russia	N/A	9.3 - 10.6	N/A	facultatively anaerobic	GCA_000377885.1
Thioalkalivibrio denitrificans ALJD	3.63935	64.6	3295	167	ALJD	Sorokin, D et al. 2001	Soda Lake in Kenya, Africa	N/A	9.5 - 11.0	N/A	facultatively anaerobic	GCA_002000365.1
Thioalkalivibrio sulfidiphilus ALJ17	3.05302	65.2	2834	69	ALJ17	Sorokin, D et al. 2012	Soda Lake in Kenya, Africa	N/A	9.5 - 11.0	N/A	facultatively anaerobic	GCA_000377945.1
Thioalkalivibrio sp. AKL19	2.88491	66.8	2639	18	AKL19	Sorokin, D et al. 2011	Kulunda Steppe, Altai, Russia	N/A	9.3 - 10.6	N/A	facultatively anaerobic	GCA_000420165.1
Halomonas chromatireducens AGD 8-3	3.97365	62.8	3509	1	AGD 8-3	Shapovalova, A et al. 2009; Gotovtsev, P et al. 2016	mixed soil sample of soda solonchak from the Kulunda steppe (Altai krai) Russia	N/A	alkaline	N/A	facultatively anaerobic	GCA_001545155.1
Halomonas sp. A3H3	5.64388	54.8016	10291	33	A3H3	Koechler, S et al. 2013	harbor sediments of l’Estaque in the south of France	N/A	N/A	653 μg/liter in sediment interstitial water and 165 mg/kg in solid phase	facultatively anaerobic	GCA_000982975.1
Nitrincola lacisaponensis 4CA	3.41213	52.1	3055	43	4CA	Dimitriu, P t al. 2005	Soap Lake in Grant County (WA) USA	N/A	9.8	N/A	facultatively anaerobic	GCA_000691225.1
Candidatus Muproteobacteria bacterium RBG_16_65_34†	2.03354	64.8	1828	109	derived from metagenome	Anantharaman, K. et al. 2016	sediment. suboxic/anoxic aquifer adjacent to the Colorado River, near Rifle, (CO) USA	N/A	7.11	N/A	N/A	GCA_001785115.1
Rhodospirillales bacterium RIFCSPLOWO2_12_FULL_67_15†	2.14886	65.7	1751	290	derived from metagenome	Anantharaman, K. et al. 2016	Groundwater adjacent to the Colorado River, near Rifle, (CO) USA	N/A	7.28	N/A	N/A	GCA_001830475.1
Betaproteobacteria bacterium RIFCSPLOWO2_12_FULL_62_58†	5.87674	61.8	5370	277	derived from metagenome	Anantharaman, K. et al. 2016	Groundwater adjacent to the Colorado River, near Rifle, (CO) USA	N/A	7.28	N/A	N/A	GCA_001772005.1
Gallionellales bacterium RIFCSPLOWO2_02_FULL_59_110†‡	2.80931	59	2496	112	derived from metagenome	Anantharaman, K. et al. 2016	Groundwater adjacent to the Colorado River, near Rifle, (CO) USA	N/A	7.28	N/A	N/A	GCA_001801215.1
Gammaproteobacteria bacterium RIFOXYD12_FULL_61_37†	3.46975	61.3	3093	57	derived from metagenome	Anantharaman, K. et al. 2016	Grounwater O2 injection, adjacent to the Colorado River, near Rifle, (CO) USA	N/A	7.39	N/A	N/A	GCA_001801995.1
Gammaproteobacteria bacterium RIFOXYA12_FULL_61_12†	3.05181	61.1	2617	218	derived from metagenome	Anantharaman, K. et al. 2016	Grounwater O2 injection, adjacent to the Colorado River, near Rifle, (CO) USA	N/A	7.67	N/A	N/A	GCA_001801965.1
Betaproteobacteria bacterium CG2_30_59_46†	2.29362	58.8	2077	425	derived from metagenome	Probst, A. et al, 2017	water from Crystal Geyser system in (UT) USA	17°C***	circumneutral***	N/A	N/A	GCA_001871385.1
Betaproteobacteria bacterium CG2_30_68_42†	3.09877	68.2	2853	95	derived from metagenome	Probst, A. et al, 2017	water from Crystal Geyser system in (UT) USA	17°C***	circumneutral***	N/A	N/A	GCA_001872285.1
Rhodocyclales bacterium CG_4_9_14_3_um_filter_68_10†	2.96182	68.1	2791	185	derived from metagenome	Probst, A. et al, 2017	water from Crystal Geyser system in (UT) USA	17°C***	circumneutral***	N/A	N/A	GCA_002791095.1
Deltaproteobacteria bacterium GWC2_42_11†	1.75104	42	1598	73	derived from metagenome	Anantharaman, K. et al. 2016	Grounwater acetate injection adjacent to the Colorado River, near Rifle, (CO) USA	N/A	7.39	N/A	N/A	GCA_001797495.1
Hydrogenophilales bacterium CG18_big_fil_WC_8_21_14_2_50_58_12†‡	2.90516	58.1	2783	314	derived from metagenome	Probst, A. et al, 2017	water from Crystal Geyser system in (UT) USA	17°C***	circumneutral***	N/A	N/A	GCA_002770925.1
Candidatus Methanoperedens nitroreducens ANME-2d	3.20339	43.2	3254	10	derived from metagenome	Haroon, M et al. 2013	laboratory scale bioreactor enriched with freshwater sediment and anaerobic wastewater sludge in Brisbane, Australia	N/A	N/A	N/A	anaerobic	GCA_000685155.1
Candidatus Methanoperedens sp. BLZ2†	3.73558	40.3	3790	85	derived from metagenome	Raghoebarsing, A et al. 2006; Berger, S et al. 2017	anoxic bioreactor inoculated with the effluent of the enrichment with sediment of the Twentekanaal. The Netherlands	N/A	N/A	N/A	N/A	GCA_002487355.1
Candidatus Methanoperedens sp. BLZ1†	3.73847	40.2	4528	514	derived from metagenome	Raghoebarsing, A et al. 2006	anoxic bioreactor inoculated with the effluent of the enrichment with sediment of the Twentekanaal. The Netherlands	N/A	N/A	N/A	N/A	GCA_001317315.1
Sulfuritortus calidifontis J1AT	2.72064	65.5	2699	1	J1A	Kojima, H. et al. 2017	Microbial Mat in Jozankei Hot spring. Japan	43 ¶	7.8 ¶	3.20 mg/L	facultatively anaerobic	AP018721.1
Strain J5B	2.86803	62.4	2557	3	J5B	not published	Microbial Mat in Jozankei Hot spring. Japan	43 ¶	7.8 ¶	3.20 mg/L	facultatively anaerobic	AP018718.1
Strain M52	2.74	63.6	2794	1	M52	not published	Microbial Mat in Jozankei Hot spring. Japan	43 ¶	7.8 ¶	3.20 mg/L	facultative anaerobic, microerophilic	AP019373
Candidatus Methanoperedens sp. UBA453	3.08605	43.3	3348	72	derived from metagenome	Parks, D et al. 2017	Metagenomic sequencing of bioreactor performing anaerobic oxidation of methane coupled to nitrate reduction.	N/A	N/A	N/A	N/A	GCA_002496325.1	N50 = 47995
Rhodocyclaceae bacterium UBA4043	2.8851	67.8	2828	218	derived from metagenome	Parks, D et al. 2017	Metagenomic sequencing of coal cuttings from Coal bed Methane well site	N/A	N/A	N/A	N/A	GCA_002382165.1	N50 = 21308
Candidatus Methanoperedens sp. Ru_enrich_MN	3.59264	40.4	3983	146	derived from metagenome	BioSample: SAMN07483404	Bioreactor mimicking brackish/coastal conditions	N/A	N/A	N/A	N/A	GCA_002634415.1	N50 = 35785
* Arsenic concentration published in Oremland, R. et al. 2017.
** Arsenic concentration published in Oremland, R et al. 2002.
*** pH and temperature published in Emerson, J et al. 2016.
¶ pH and temperature published in Kojima et al., 2017.
†Correspond to genomes derived from metagenomes.
‡Representative genome of three identical assemblies.
Abbreviation. NA, not available.
